# Supplementary material for: Protective effect of vitexin against high fat-induced vascular endothelial inflammation through inhibiting trimethylamineN-oxide-mediated RNA m6A modification
Source: Royal Society of Chemistry journal article supplement (doi:10.1039/d3fo04743a), 2024-01-01
Supplement: d3fo04743a1.pdf [file d3fo04743a1.pdf]

## **Supplementary Information**

### **Protective effect of vitexin against high fat-induced vascular endothelial inflammation through inhibiting trimethylamine N-oxide-mediated RNA m6A modification**

Wenwen Li<sup>a</sup>, Zeyuan Deng<sup>a,b,c</sup>, Shuang Xiao<sup>a</sup>, Qian Du<sup>a</sup>, Mengru Zhang<sup>a</sup>, Hailing Song<sup>a</sup>, Caidong Zhao<sup>a</sup> and Liufeng Zheng<sup>a,b\*</sup>

<sup>a</sup> State Key Laboratory of Food Science and Resources, Nanchang University, Nanchang 330047, Jiangxi, China

<sup>b</sup> International Institute of Food Innovation, Nanchang University, Nanchang 330051, Jiangxi, China

<sup>c</sup> Institute for Advanced Study, University of Nanchang, Nanchang 330031, Jiangxi, China

\*Correspondence to: Liufeng Zheng.

E-mail address: zhenglf2018@ncu.edu.cn

**Table S1. Quality control parameters for biochemical analysis tests**

| Assay | Range          | Sensitivity   | Intra CV | Inter CV | Min sample  |
|-------|----------------|---------------|----------|----------|-------------|
| TC    | 0-19.39 mmol/L | > 0.01 mmol/L | < 3.0%   | < 5.0%   | 2.5 $\mu$ L |
| LDL-C | 0-10.40 mmol/L | > 0.01 mmol/L | < 8.0%   | < 10.0%  | 2.5 $\mu$ L |
| HDL-C | 0-5.16 mmol/L  | > 0.09 mmol/L | < 3.0%   | < 5.0%   | 2.5 $\mu$ L |

**Table S2. Primer sequences for qRT-PCR**

|       | Gene                            | Forward primer             | Reverse primer             |
|-------|---------------------------------|----------------------------|----------------------------|
|       | <i>IL-6</i>                     | CTCCCAACAGACCTGTCTATAC     | CCATTGCACAACCTCTTTTCTCA    |
|       | <i>IL-8</i>                     | CATCTTCGTCCGTCCTGTG        | GACTGCTATCACTTCCTTTCTGTTGC |
|       | <i>IL-1<math>\beta</math></i>   | GAAATGCCACCTTTTGACAGTG     | TTAACTCATCCCGTGCCATAAC     |
| Mouse | <i>ICAM</i>                     | CAATTTCTCATGCCGCACAG       | AGCTGGAAGATCGAAAGTCCG      |
|       | <i>TNF-<math>\alpha</math></i>  | ATGTCTCAGCCTCTTCTCATTC     | GCTTGTCACTCGAATTTTGAGA     |
|       | <i>GAPDH</i>                    | TGAAGGTCGGTGTGAACGG        | CGTGAGTGGAGTCATACTGGAA     |
|       | <i><math>\beta</math>-actin</i> | TTG CTG ACA GGA TGC AGA AG | ACATCTGCTGGAAGGTGGAC       |
|       | <i>IL-6</i>                     | TGCAATAACCACCCCTGACC       | GTGCCCATGCTACATTTGCC       |
|       | <i>IL-8</i>                     | ACTGAGAGTGATTGAGAGTGGAC    | AACCCTCTGCACCCAGTTTTTC     |
| Human | <i>GAPDH</i>                    | CAATGACCCCTTCATTGACC       | TTGATTTTGGAGGGATCTCG       |
|       | <i><math>\beta</math>-actin</i> | CCTGACTGACTACCTCATGAAG     | GACGTAGCACAGCTTCTCCTTA     |

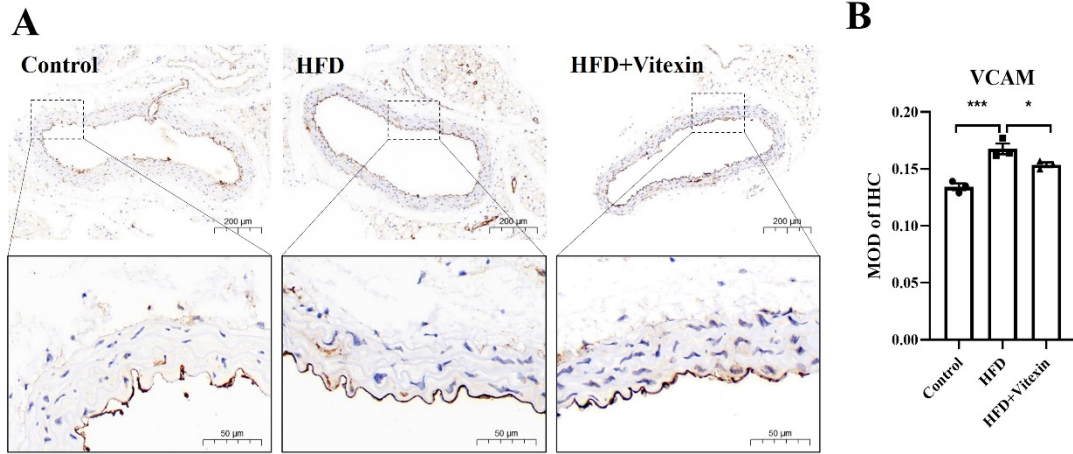

**Fig. S1. (A) Immunohistochemical images of VCAM. (B) Quantitative analysis of VCAM immunohistochemical images. Numbers indicate mean  $\pm$  SEM (n = 3). \* $P$  < 0.05, \*\*\* $P$  < 0.001.**
